# Supplementary material for: Medikamentöse Ausstattung arztbesetzter Rettungsmittel – ist eine präklinische Therapie nach aktuellen Leitlinien möglich?
Source: Springer Nature journal article supplement (doi:10.1007/s10049-022-01036-6), 2022-05-13
Supplement: MOESM1 [file 10049_2022_1036_MOESM1_ESM.pdf]

**Zusatzmaterial zum Beitrag** „Medikamentöse Ausstattung arztbesetzter Rettungsmittel – ist eine präklinische Therapie nach aktuellen Leitlinien möglich?“ von Carstens E, Eismann H, Flentje M et al. (2022) in *Notfall+Rettungsmedizin*

Beitrag und Zusatzmaterial stehen Ihnen auf [www.springermedizin.de](http://www.springermedizin.de) zur Verfügung. Bitte geben Sie dort den Beitragstitel in die Suche ein.

## Empfehlungs- und Evidenzgrade nach European Society of Cardiology (ESC)

| Empfehlungsgrad    | Definition                                                                                                                                                                                    | Empfohlene Formulierung        |
|--------------------|-----------------------------------------------------------------------------------------------------------------------------------------------------------------------------------------------|--------------------------------|
| <b>I</b>           | Evidenz und/oder allgemeine Übereinkunft, dass eine Therapieform oder eine diagnostische Maßnahme effektiv, nützlich oder heilsam ist                                                         | Wird empfohlen / ist indiziert |
| <b>II</b>          | Widersprüchliche Evidenz und/ oder unterschiedliche Meinungen über den Nutzen/die Effektivität einer Therapieform oder einer diagnostischen Maßnahme                                          |                                |
| <b>IIa</b>         | Evidenzen/ Meinungen favorisieren den Nutzen bzw. die Effektivität einer Maßnahme                                                                                                             | sollte erwogen werden          |
| <b>IIb</b>         | Nutzen/ Effektivität einer Maßnahme ist weniger gut durch Evidenzen/Meinungen belegt                                                                                                          | kann erwogen werden            |
| <b>III</b>         | Evidenz und/oder allgemeine Übereinkunft, dass eine Therapieform oder eine diagnostische Maßnahme nicht effektiv, nicht nützlich oder nicht heilsam ist und im Einzelfall schädlich sein kann | wird nicht empfohlen           |
| <b>Evidenzgrad</b> |                                                                                                                                                                                               |                                |
| <b>A</b>           | Daten aus mehreren, randomisierten klinischen Studien oder Meta-Analysen                                                                                                                      |                                |
| <b>B</b>           | Daten aus einer randomisierten klinischen Studie oder mehreren großen nicht randomisierten Studien                                                                                            |                                |
| <b>C</b>           | Konsensusmeinung von Experten und/oder kleinen Studien, retrospektiven Studien oder Registern                                                                                                 |                                |

## Vorgehaltene Medikamente auf ärztlich besetzten Rettungsmitteln,

Vorhaltung in %, per os (p.o.), intramuskulär (i.m.), intravenös (i.v.), subkutan (s.c.).

| Wirkstoff                | Darreichung | %   |
|--------------------------|-------------|-----|
| Acetylsalicylsäure       | i.v.        | 100 |
| Amiodaron                | i.v.        | 100 |
| Atropinsulfat            | i.v.        | 100 |
| Epinephrin               | i.v.        | 100 |
| Esketamin                | i.v.        | 100 |
| Furosemid                | i.v.        | 100 |
| Metoprolol               | i.v.        | 100 |
| Morphin                  | i.v.        | 100 |
| (Methyl-)Prednisolon     | i.v.        | 100 |
| Vollelektrolyt-Lösung    | i.v.        | 100 |
| Glyceroltrinitrat        | Spray       | 98  |
| Heparin                  | i.v.        | 98  |
| Naloxon                  | i.v.        | 98  |
| Butylscopolaminiumbromid | i.v.        | 96  |
| Midazolam                | i.v.        | 96  |
| Prednison                | Zäpfchen    | 96  |

|                             |            |    |
|-----------------------------|------------|----|
| Urapidil                    | i.v.       | 96 |
| Atropinsulfat 100mg         | i.v.       | 94 |
| Cafedrin / Theoadrenalin    | i.v.       | 94 |
| Flumazenil                  | i.v.       | 94 |
| Magnesiumsulfat             | i.v.       | 94 |
| Reproterol                  | i.v.       | 94 |
| Salbutamol                  | inhalativ  | 94 |
| Tranexamsäure               | i.v.       | 92 |
| NaCl 0,9 % 10 ml            | i.v.       | 90 |
| Noradrenalin                | i.v.       | 90 |
| Rocuronium                  | i.v.       | 90 |
| Dimenhydrinat               | i.v.       | 88 |
| Ipratropiumbromid           | inhalativ  | 88 |
| Metamizol-Natrium           | i.v.       | 88 |
| Propofol 1 %                | i.v.       | 88 |
| Adenosin                    | i.v.       | 86 |
| Fentanyl                    | i.v.       | 84 |
| Lidocain                    | i.v.       | 84 |
| Aktivkohle                  | p.o.       | 80 |
| Dimetinden                  | i.v.       | 80 |
| Paracetamol                 | Zäpfchen   | 80 |
| Succinylcholin              | i.v.       | 78 |
| Diazepam                    | rectal     | 72 |
| Oxytocin                    | i.v.       | 72 |
| Glucose 40%                 | i.v.       | 70 |
| Lorazepam                   | p.o.       | 68 |
| Dimethylaminophenol (4DMAP) | i.v.       | 66 |
| Natriumbikarbonat 8,4%      | i.v.       | 66 |
| Toluidinblau                | i.v.       | 66 |
| Fenoterol                   | i.v.       | 64 |
| NaCl 0,9 % 100 ml           | i.v.       | 64 |
| Aqua dest                   | i.v.       | 62 |
| Haloperidol                 | i.v.       | 62 |
| Tenecteplase                | i.v.       | 62 |
| Piritramid                  | i.v.       | 60 |
| Verapamil                   | i.v.       | 56 |
| Dobutamin                   | i.v.       | 50 |
| Ondansetron                 | i.v.       | 50 |
| Physostigmin                | i.v.       | 50 |
| Calziumgluconat             | i.v.       | 48 |
| Biperiden                   | i.v.       | 48 |
| Ajmalin                     | i.v.       | 46 |
| Thiopental                  | i.v.       | 46 |
| Etomidat                    | i.v.       | 44 |
| Natriumthiosulfat           | i.v.       | 44 |
| Nitrendipin                 | sublingual | 44 |
| Ranitidin                   | i.v.       | 44 |
| Hydroxocobalamin            | i.v.       | 40 |
| Diazepam                    | i.v.       | 38 |
| Dimeticon/Simeticon         | p.o.       | 34 |
| Acetylsalicylsäure          | p.o.       | 32 |
| Glucose 5%                  | i.v.       | 32 |

|                                 |               |    |
|---------------------------------|---------------|----|
| Lorazepam                       | i.v.          | 32 |
| Paracetamol                     | i.v.          | 32 |
| Clonidin                        | i.v.          | 30 |
| Ibuprofen                       | Zäpfchen      | 30 |
| Glyceroltrinitrat               | i.v.          | 26 |
| Fenoterol                       | inhalativ     | 26 |
| Clonazepam                      | i.v.          | 24 |
| Glucose 10%                     | i.v.          | 22 |
| Obidoximchlorid                 | i.v.          | 22 |
| Terbutalin                      | s.c.          | 22 |
| Theophyllin                     | i.v.          | 22 |
| Midazolam                       | p.o.          | 22 |
| Promethazin                     | i.v.          | 20 |
| Ceftriaxon                      | i.v.          | 18 |
| Gelafundin                      | i.v.          | 18 |
| Ibuprofen                       | Saft          | 18 |
| Alteplase                       | i.v.          | 16 |
| Glucose 20%                     | i.v.          | 16 |
| Metoclopramid                   | i.v.          | 16 |
| Oxybuprocain                    | Augentropfen  | 16 |
| Sufentanil                      | i.v.          | 16 |
| Clemastin                       | i.v.          | 16 |
| Beclometasondipropionat         | inhalativ     | 14 |
| Granisetron                     | i.v.          | 14 |
| Cimetidin                       | i.v.          | 12 |
| Hydroxyethylstärke              | i.v.          | 12 |
| Levetiracetam                   | i.v.          | 12 |
| NaCl 0,9 % 500 ml               | i.v.          | 12 |
| Nalbuphin                       | i.v.          | 12 |
| Phenytoin                       | i.v.          | 12 |
| Cefotaxim                       | i.v.          | 10 |
| Dexamethason                    | i.v.          | 10 |
| Epinephrin - InfectoKrupp       | inhalativ     | 10 |
| Mepivacain 1 -2%                | peri neural   | 10 |
| Budesonid                       | inhalativ     | 8  |
| Dobutamin                       | Zäpfchen      | 8  |
| Ondansetron                     | i.v.          | 8  |
| Physostigmin                    | p.o.          | 8  |
| Chitosan                        | Hämostyptikum | 6  |
| Clopidogrel                     | p.o.          | 6  |
| NaCl 0,9 % 250 ml               | i.v.          | 6  |
| Orciprenalin                    | i.v.          | 6  |
| Phosphatpuffer                  | Augenspülung  | 6  |
| Retepase                        | i.v.          | 6  |
| Sugammadex                      | i.v.          | 6  |
| Terlipressin                    | i.v.          | 6  |
| Ticagrelor                      | p.o.          | 6  |
| Ammoniak Lavendel Riechstäbchen | nasal         | 4  |
| Diazepam                        | p.o.          | 4  |
| Diclofenac                      | p.o.          | 4  |
| Ephedrin                        | i.v.          | 4  |
| Glucagon                        | i.v.          | 4  |

|                         |               |   |
|-------------------------|---------------|---|
| Glucose 50%             | i.v.          | 4 |
| Glucose Gel             | p.o.          | 4 |
| Jubin (Glucose)         | p.o.          | 4 |
| Methoxyfluran           | inhalativ     | 4 |
| Naloxon                 | nasal         | 4 |
| Penicillin              | i.v.          | 4 |
| Phenobarbital           | i.v.          | 4 |
| Proparacain             | Augentropfen  | 4 |
| Proximetacin            | Augentropfen  | 4 |
| Thiamin                 | i.v.          | 4 |
| Xylometazolin 0,1%      | nasal         | 4 |
| Atracurium              | i.v.          | 2 |
| Benperidol              | i.v.          | 2 |
| Calziumglukonat Gel     | topisch       | 2 |
| Cisatracurium           | i.v.          | 2 |
| Dehydrobenzperidol      | i.v.          | 2 |
| Digitoxin               | i.v.          | 2 |
| Digoxin                 | i.v.          | 2 |
| Diphoterin              | Augenspülung  | 2 |
| E 148 P1                | i.v.          | 2 |
| Enoxaparin              | s.c./i.v.     | 2 |
| Etilifrin               | p.o.          | 2 |
| Gelaspon-Schwamm        | Hämostyptikum | 2 |
| Ibuprofen               | p.o.          | 2 |
| Insulin                 | s.c.          | 2 |
| Kaliumchlorid           | i.v.          | 2 |
| Kaolin                  | Hämostyptikum | 2 |
| Lipovenös               | i.v.          | 2 |
| Methylergometrin        | i.v.          | 2 |
| Nifedipin               | sublingual    | 2 |
| Parafinöl               | p.o.          | 2 |
| Parasorb                | Hämostyptikum | 2 |
| Piperacillin/Tazobactam | i.v.          | 2 |
| Vasopressin             | i.v.          | 2 |
| Vecuronium              | i.v.          | 2 |
